# Supplementary material for: A preliminary investigation of the mechanism of hexavalent chromium removal by corn-bran residue and derived chars
Source: Royal Society of Chemistry journal article supplement (doi:10.1039/c4ra12351d), 2015-01-01
Supplement: c4ra12351d1.pdf [file c4ra12351d1.pdf]

## Table and Figure Captions

### Tables

Table 1 pH, Ash contents, elemental compositions, atomic ratios, and SSA of the CBR and CBR-biochars produced at different pyrolysis temperatures.

Table 2 Parameters of Freundlich and Langmuir models for Cr(VI) removal.

Table 1

| pH, ash, elemental composition, atomic ratio, surface area |      |                   |        |       |       |       |       |       |       |         |                        |
|------------------------------------------------------------|------|-------------------|--------|-------|-------|-------|-------|-------|-------|---------|------------------------|
| Sample                                                     | pH   | pH <sub>PZC</sub> | Ash(%) | C (%) | H (%) | N (%) | O (%) | H/C   | O/C   | (O+N)/C | SSA(m <sup>2</sup> /g) |
| CBR                                                        | 4.02 | 3.89              | 6.12   | 44.12 | 5.65  | 4.24  | 45.99 | 1.537 | 0.782 | 0.864   | 0.447                  |
| CBR300                                                     | 6.08 | 5.85              | 14.18  | 56.53 | 3.86  | 5.07  | 42.26 | 0.819 | 0.561 | 0.638   | 0.986                  |
| CBR400                                                     | 6.89 | 6.63              | 20.07  | 65.68 | 3.70  | 5.11  | 25.51 | 0.676 | 0.292 | 0.358   | 1.420                  |
| CBR500                                                     | 7.03 | 6.82              | 20.11  | 71.95 | 3.08  | 4.69  | 20.28 | 0.514 | 0.211 | 0.267   | 7.155                  |
| CBR600                                                     | 8.92 | 8.74              | 21.43  | 73.36 | 2.78  | 4.47  | 19.39 | 0.455 | 0.198 | 0.250   | 58.232                 |

Table 2

| Samples | Freundlich |      |       | Langmuir |      |       |
|---------|------------|------|-------|----------|------|-------|
|         | $K_F$      | $n$  | $R^2$ | $q_e$    | $b$  | $R^2$ |
| CBR     | 3.89       | 1.43 | 0.99  | 40.99    | 4.32 | 0.546 |
| CBR300  | 2.53       | 1.43 | 0.97  | 37.35    | 3.35 | 0.501 |
| CBR400  | 1.70       | 1.19 | 0.99  | 39.75    | 4.04 | 0.504 |
| CBR500  | 2.34       | 1.23 | 0.99  | 41.43    | 3.49 | 0.503 |
| CBR600  | 4.52       | 1.45 | 0.98  | 42.83    | 3.58 | 0.506 |

## Figures

Fig.1. Functional groups present on CBR and CBR-chars inferred from FT-IR ( $\text{cm}^{-1}$ ).

Fig.2. Effects of initial pH on Cr(VI) removal efficiency of CBR and CBR-derived chars at initial Cr(VI) concentration of  $50 \text{ mg L}^{-1}$ .

Fig.3 Effects of time on Cr concentration at initial pH of 2, and Cr(VI) concentration of  $50 \text{ mg L}^{-1}$

Fig.4. Effects of initial Cr(VI) concentration on Cr(VI) removals by CBR and CBR-derived chars at pH 2.

Fig.5. Effects of addition amounts of CBR or CBR-chars on Cr(VI) removal efficiency at initial pH 2 and Cr(VI) concentration  $50 \text{ mg L}^{-1}$ .

Fig.6. Functional groups present on CBR and CBR-chars inferred from FT-IR ( $\text{cm}^{-1}$ ) after Cr adsorption under the conditions of initial pH of 2, Cr(VI) concentration of  $50 \text{ mg L}^{-1}$ , and adsorbent dosage of  $5 \text{ g L}^{-1}$ .

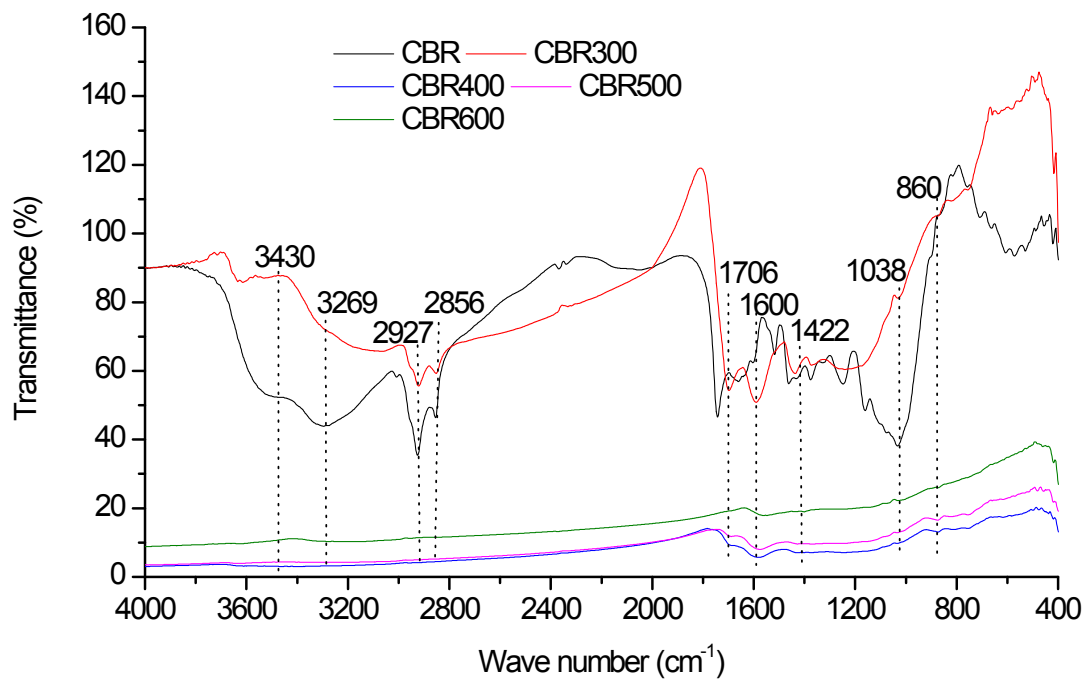

Fig.1

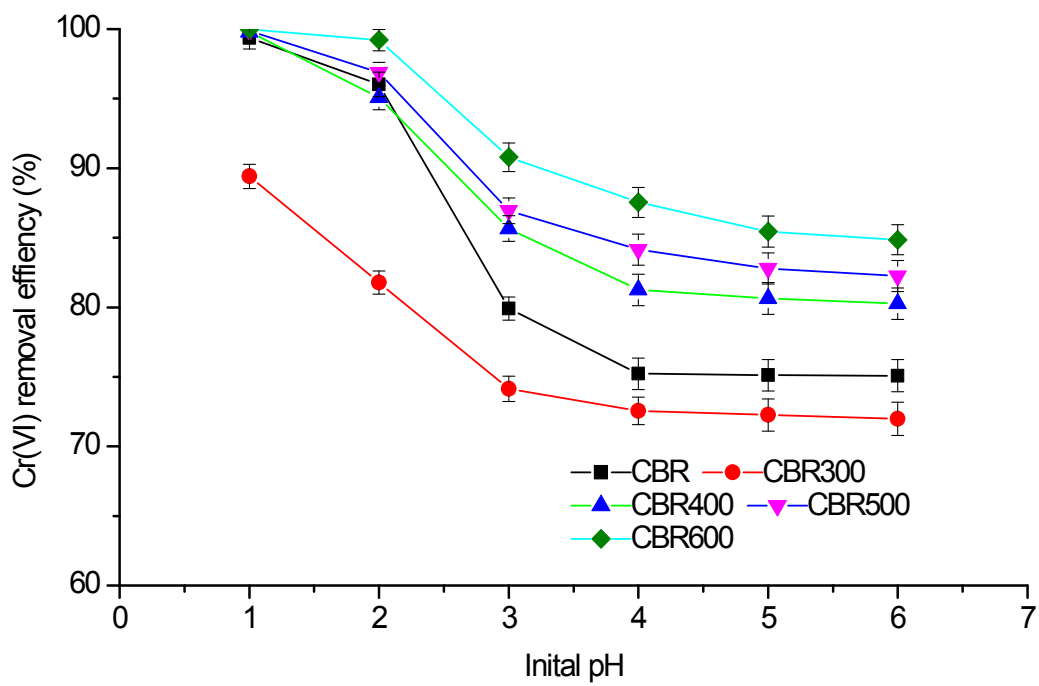

Fig.2

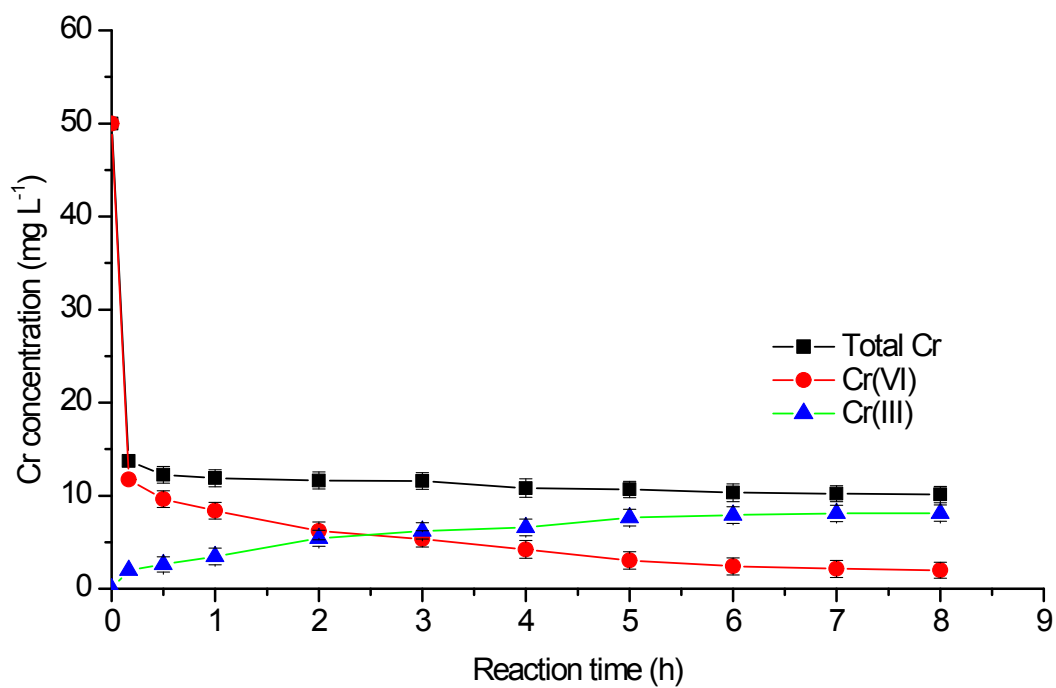

Fig.3

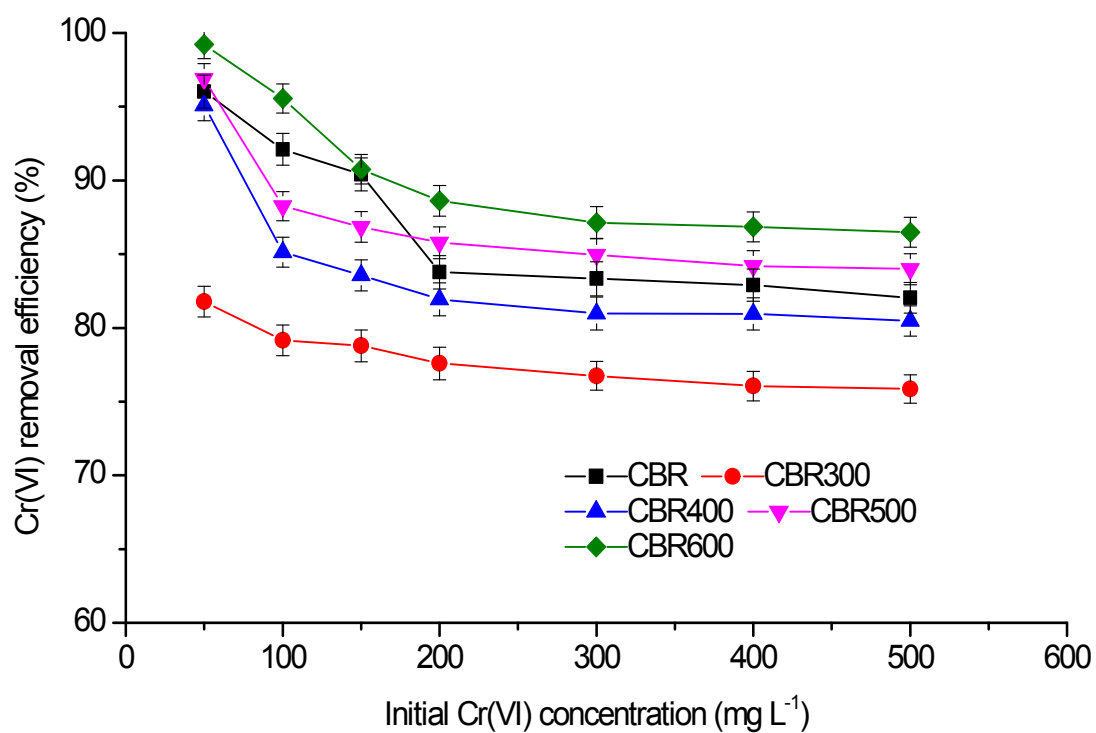

Fig.4

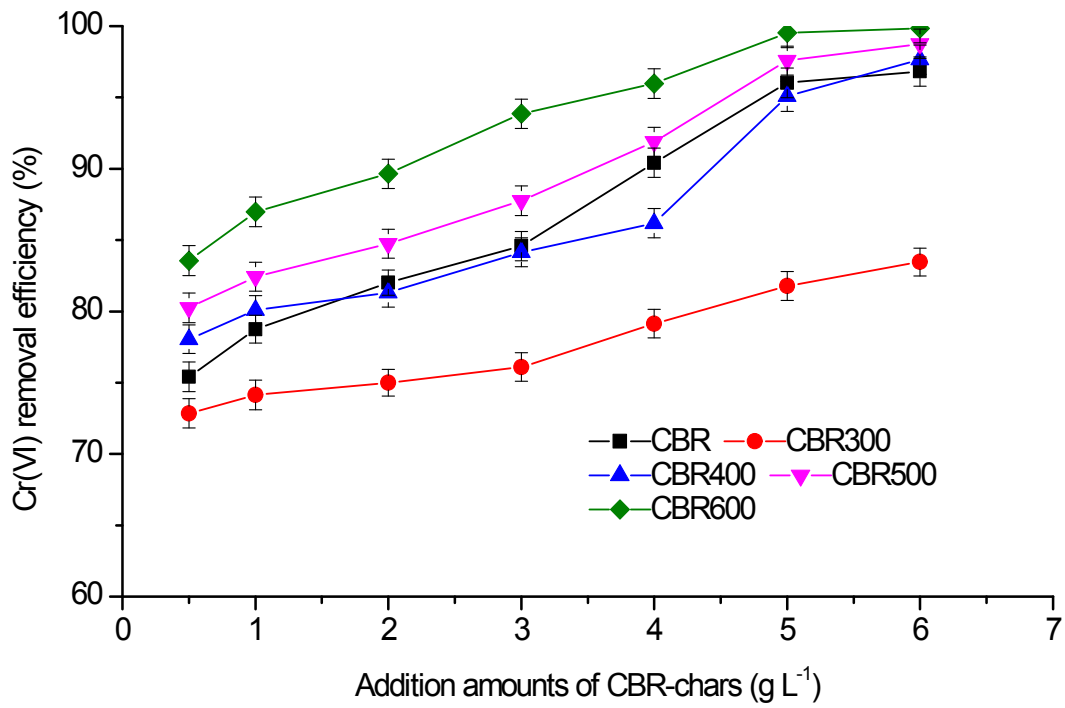

Fig.5

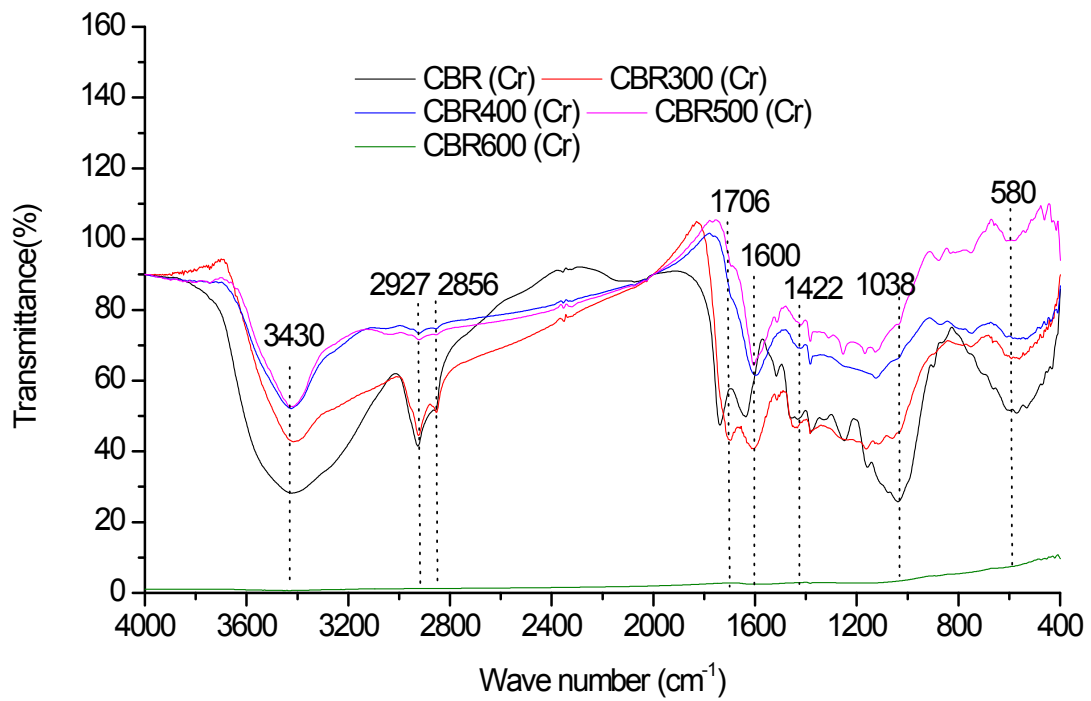

Fig.6
